# Supplementary material
Source: publisher figshare collection journal article supplement (https://acs.figshare.com/ndownloader/files/6949661)
Supplement: Supplementary file 1 [file 6949661]

## Supporting Information

### Phase transfer directed synthesis of hollow zeolitic imidazolate frameworks-67 nanocages

Bo Yu,<sup>†,‡</sup> Dejiang Zhang,<sup>†,‡</sup> Shichao Du,<sup>†,‡</sup> Yan Wang,<sup>†,‡</sup> Mingyang Chen,<sup>†,‡</sup> Jie Hou,<sup>†,‡</sup> Shijie Xu,<sup>†,‡</sup> Songgu Wu,<sup>†,‡</sup> and Junbo Gong<sup>†,‡,\*</sup>

<sup>†</sup>State Key Laboratory of Chemical Engineering, School of Chemical Engineering and Technology, Tianjin University, Tianjin 300072, P.R. China

<sup>‡</sup>Collaborative Innovation Center of Chemistry Science and Engineering, Tianjin 300072, P.R. China

#### Experimental section

##### *Synthesis of Cu<sub>2</sub>O cubes*

Cubic Cu<sub>2</sub>O nanocrystals were obtained by the typical reduction method. In brief, 0.11 g CuSO<sub>4</sub> and 0.2 g PVP (K-30) were dissolved in 18 mL deionized water. Then, 1 mL water solution containing sodium citrate (0.218 g) and Na<sub>2</sub>CO<sub>3</sub> (0.127 g) was dropwise added into the CuSO<sub>4</sub> solution, and the reaction was carried out at room temperature for 10 min with stirring. After that, 1 mL glucose (0.28 g) water solution was injected into the suspension, and the reduction was allowed for 2 h at 80 °C. Red colored Cu<sub>2</sub>O cubes were obtained by centrifugation and dried for 24 h at 60 °C in vacuum after washed by ethanol.

##### *Synthesis of Co(OH)<sub>2</sub> and ZIF-67 nanocages*

In brief, 5 mg Cu<sub>2</sub>O and 0.3 g PVP (K-30) were dissolved in the mixture of 5 mL ethanol and 5 mL deionized water. Then, 1.7 mg CoCl<sub>2</sub>·2H<sub>2</sub>O was added into the

suspension and stirred for 10 min. After that, 4 mL 1 M  $\text{Na}_2\text{S}_2\text{O}_3$  water solution was dropwise added, and the etching process was carried out at room temperature for 10 min.  $\text{Co}(\text{OH})_2$  nanoparticles were collected by centrifugation and re-dispersed in 2 mL methanol washed by ethanol. ZIF-67 nanocages were obtained by addition of 3 mL 2-methylimidazole (0.2 g) methanol into the  $\text{Co}(\text{OH})_2$  suspension. The transformation was allowed from 12 to 48 h with the temperature ranging from 25 to 60 °C.

#### *Synthesis of ZIF-67 by hydrothermal method*

Typically, 5 mmol  $\text{Co}(\text{CH}_3\text{COO})_2 \cdot 4\text{H}_2\text{O}$  and 50 mmol 2-methylimidazole were dissolved in 60 and 40 mL methanol, respectively. Then, Co(II) methanol solution was dropwise added into the 2-methylimidazole solution at room temperature with stirring. After that, the suspension was allowed for 24 h in a 50 °C oven. The ZIF-67 nanocrystals were collected by centrifugation at 10,000 rpm for 10 min, and dried for 24 h at 80 °C after washed by methanol.

#### *Characterization of nanocrystals*

Morphology of the synthesized nanocrystals was characterized by high-resolution analytical transmission electron microscopy (TEM, Fei Tecnai G2 F20) and field emission scanning electron microscope (SEM, Hitachi S-4800). The crystalline structure of materials was characterized by powder X-ray diffraction (XRD, Rigaku D/MAX-2500, Japan). Determination of Co, Cu and S elements were conducted on the ICP-MS (Agilent 7700x). Thermogravimetric (TG) analysis were carried on a TG/DSC apparatus (Mettler Toledo, Switzerland) with a heating rate of

5 °C/min. N<sub>2</sub> adsorption was carried on the Micromeritics Tristar II 3020 at 77 K.

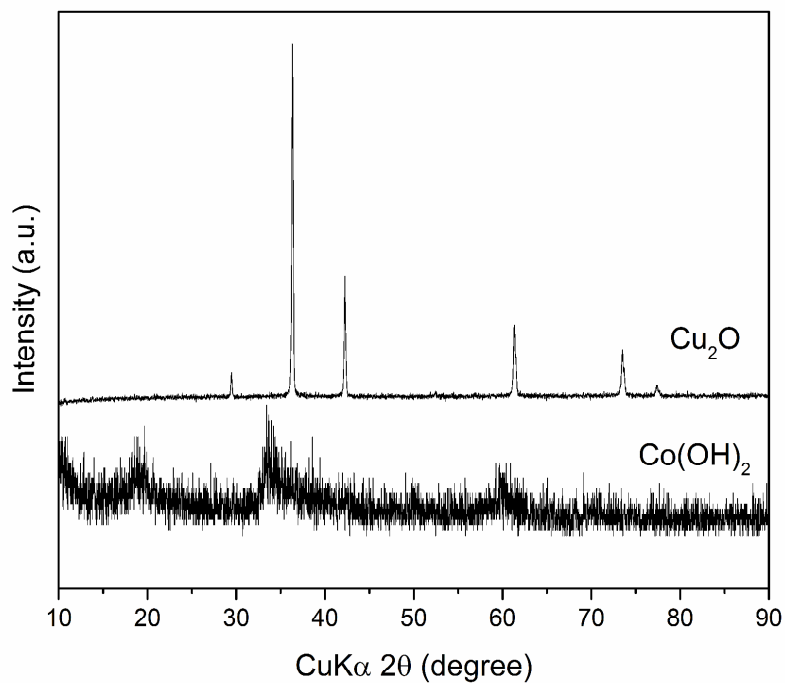

**Figure S1.** XRD analysis of Cu<sub>2</sub>O before etching process and Co(OH)<sub>2</sub> formed after etching process.

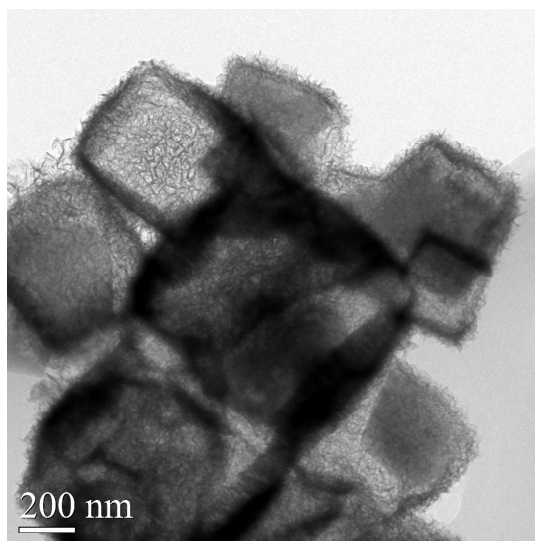

**Figure S2.** TEM image of cubic Co(OH)<sub>2</sub> nanocages formed by coordinating etching

and precipitation process.

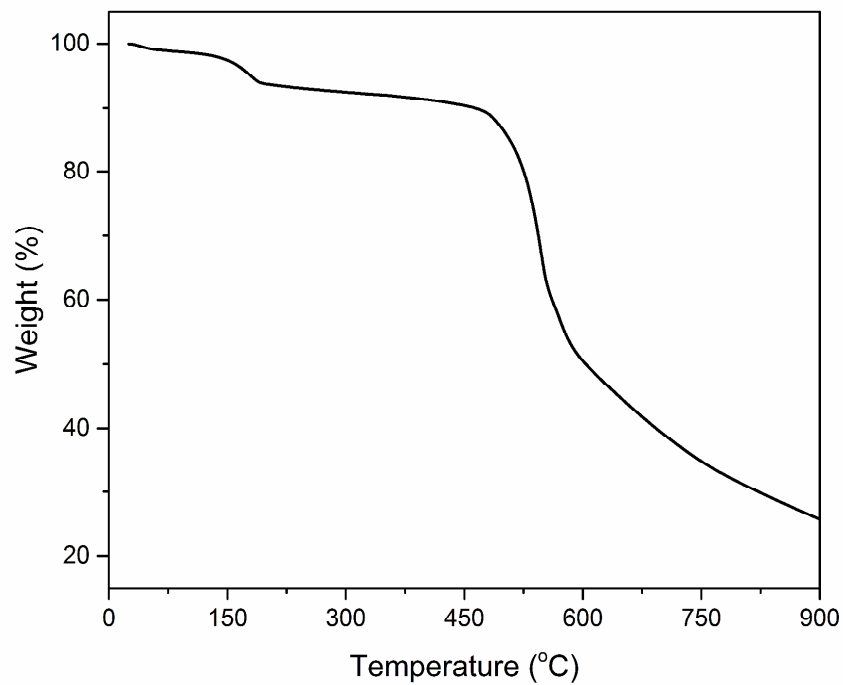

**Figure S3.** TG of synthesized cubic ZIF-67 nanocages

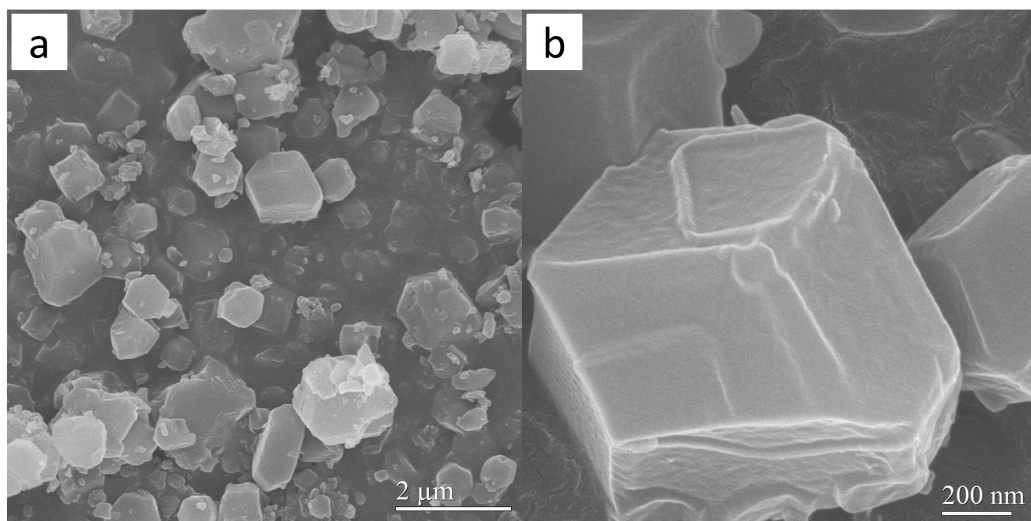

**Figure S4.** SEM images of ZIF-67 by hydrothermal method.
